# Supplementary material
Source: publisher figshare collection journal article supplement (https://gsajournals.figshare.com/ndownloader/files/14929772)

Genes in list are highlighted in red

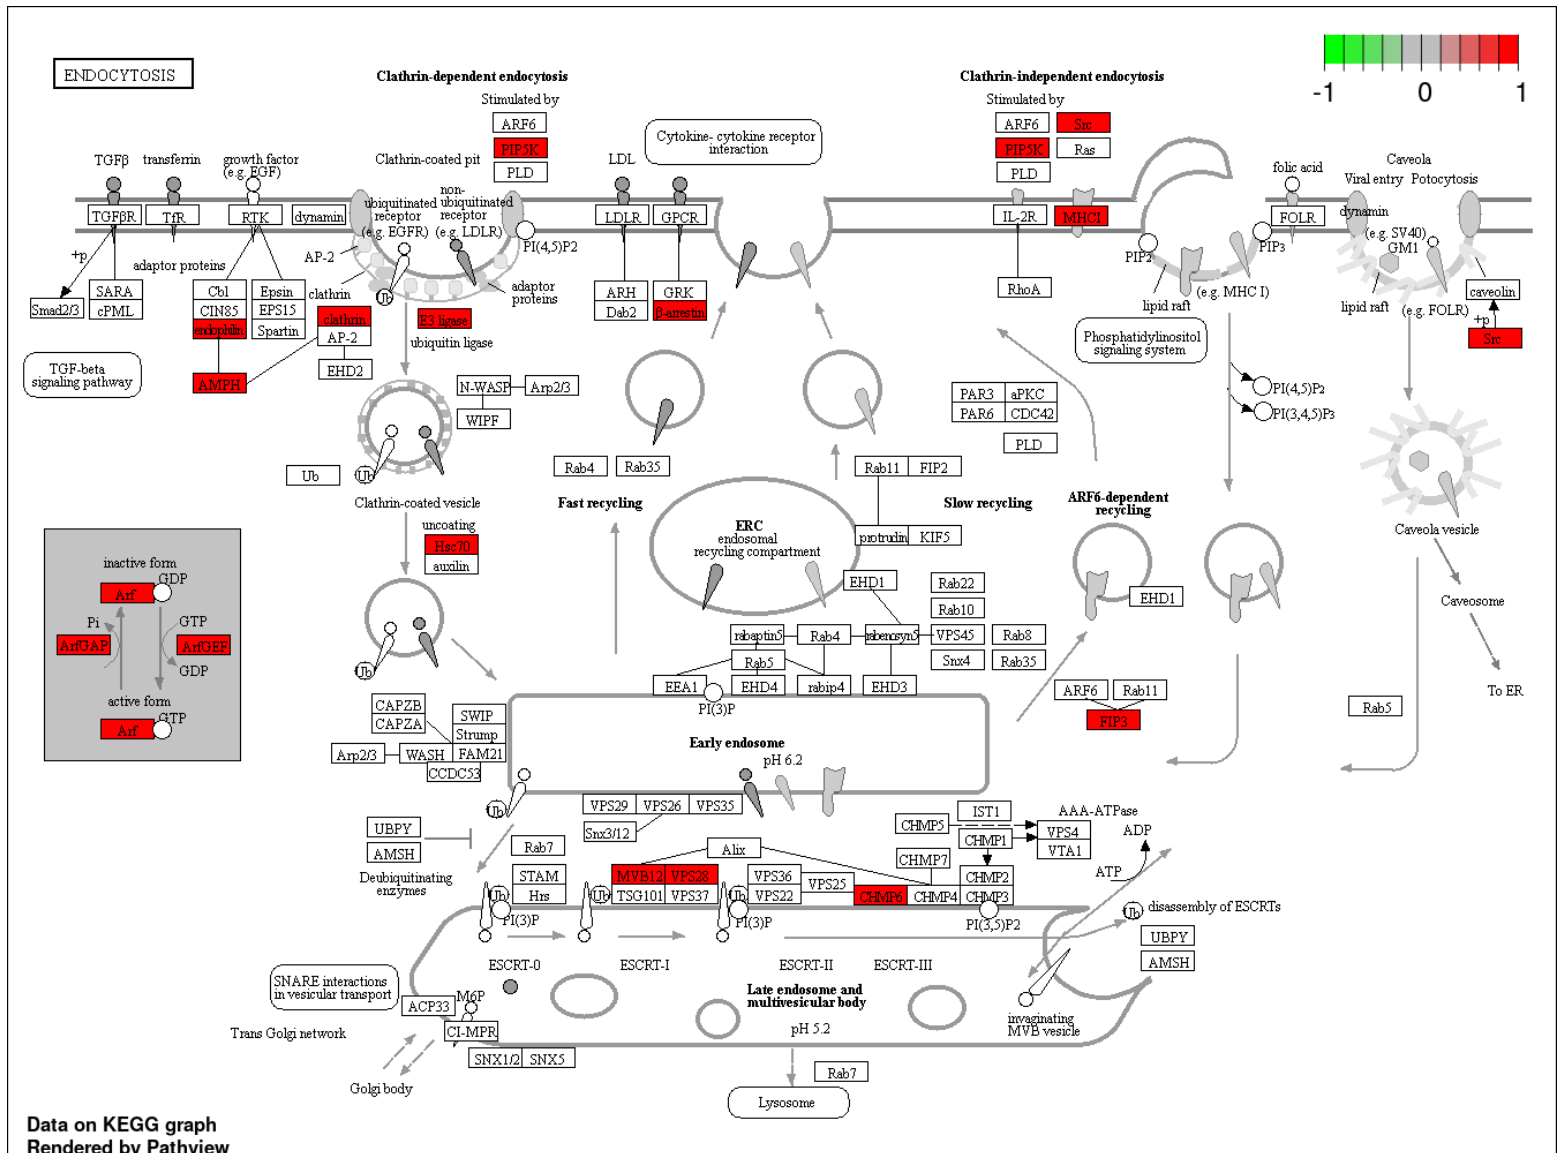

Supplement: Supplementary file 1 [file 14929772]
